1 **Title:** Interactive 3D visualization and post-processing analysis of vertex-based unstructured polyhedral meshes  
2 with ParaView

3 **Author:** Paula C. Sanematsu<sup>1</sup>

4 <sup>1</sup>: Department of Physics, Syracuse University, Syracuse, NY 13244, USA.

## 5 **Abstract**

6 The development of physics-based 3D models that investigate the behavior of biological tissues requires effective  
7 and efficient visualization tools. The open-source software ParaView has such capabilities, but often impose a  
8 steep learning curve due to the use of the Visualization Toolkit (VTK) data structures. To overcome this, I show how  
9 to setup the components of 3D vertex-like models, i.e., vertices, faces, and polyhedra, into the VTK data format  
10 and then output as ParaView unstructured grid files. I present a few relevant tools to visualize and analyze the files  
11 in ParaView. All sample codes are available in the Github repository [vis3Dvertex](#).

## 12 **Keywords**

13 Unstructured polyhedral mesh; 3D vertex model; 3D Voronoi model; ParaView; interactive visualization

## 14 **1. Introduction**

15 The development of 2D continuum- [1], particle- [2], and vertex-based models [3-5] to understand the behavior of  
16 cellular tissues has revolutionized our understanding of how biological cells behave and interact with each other  
17 from a mechanistic point of view. One remarkable example is how vertex models allowed us to understand how  
18 epithelial tissue in the lungs behave differently for normal vs. asthmatic tissue [6]. In this work, the visualization of  
19 modeling and experimental results was crucial to understand the biological processes.

20 With the rapid advancement of biological imaging and computational power, it is reasonable to expect the further  
21 advancement of 3D vertex models as the 2D models rely on the assumption that a cross sectional plane of a 3D  
22 tissue is representative of the entire height of a monolayer tissue. Although this is a reasonable assumption in  
23 many instances, for various other cases, it is not [7, 8]. Beyond the monolayer configuration, researchers have  
24 developed 3D vertex models to understand how polyhedral-shaped cells behave in a three-dimensional tissue.  
25 Studies as early as 2004 [9] developed 3D vertex models to understand cell deformation and rearrangement under  
26 external forces. Merkel and Manning [10] showed that a vertex-like 3D self-propelled Voronoi (SPV) model,  
27 governed by an energy functional depended on cell shapes exhibited a rigidity transition, similarly to the 2D vertex  
28 model. In general, vertex-like models in 2D and 3D include vertex [11] and Voronoi [10] models. The former has  
29 the cell vertices as the degrees of freedom whereas, in the latter, a Voronoi tessellation is created based on the  
30 cell centers which, in turn, are considered the degrees of freedom. Hereinafter, the term “3D vertex models” refers  
31 to the class of vertex-like models, including vertex and Voronoi models.

32 An essential component to the further advancement of 3D vertex models is the efficient visualization of simulation  
33 results. However, 3D visualization is not trivial because visualizing polyhedra requires rendering, that is, converting  
34 a 3D image into a 2D image in the computer. Rendering can be a computationally intensive task, which may limit  
35 the user’s possibilities while visualizing simulation results because every time the user changes the at angle,  
36 transparency, or coloring, a new rendering is performed. Thus, fast 3D rendering is indispensable for the  
37 visualization of 3D vertex models.

## 38 **2. Problems and Background**

39 In the published work of 3D vertex models, mostly two software have been used for visualization: POV-Ray [12]  
40 and MATLAB [13]. POV-Ray is a free and open-source ray tracing software that generates renderings based on a  
41 text-based scene description. It shows an intuitive representation of the data and has very high-resolution  
42 rendering, to the point that some renderings (not from vertex simulations) resemble real pictures. POV-Ray’s main  
43 disadvantage is the lack of user interaction. If the user wants to change the camera angle or the rendering color,  
44 those must be done in the text-based scene description file, and then re-render the visualization. MATLAB is a  
45 proprietary software with limited 3D rendering capabilities that includes camera angle changes, zooming in/out,  
46 but it lacks the ability to manipulate on the rendering.

47 Some scientific visualization software have been especially designed for fast 3D rendering of scientific data, such as  
48 VisIt [14], ParaView [15], and Avizo (Thermo Fisher Scientific). All have a GUI with a pipeline of input data and data  
49 manipulators rather than text-based interfaces like MATLAB or Matplotlib [16] that are commonly used for  
50 visualization of 2D simulations. Avizo is a commercial software widely used in the petroleum and geophysical  
51 communities. VisIt and ParaView are free and open-source and have extremely powerful parallelization  
52 capabilities. To put into perspective, the Department of Energy (DOE) Advanced Simulation and Computing  
53 Initiative (ASCI) developed VisIt for *terascale* simulations. ParaView was also designed to visualize and analyze  
54 extremely large datasets. It has successfully run on various platforms on 4000-32000 cores and it was able to  
55 visualize a billion-particle simulation [17]. Although parallelization of scientific visualization is not the focus of this  
56 work, ParaView allows this extension if parallelization of 3D vertex simulations becomes necessary.

57 In this work, I use ParaView to demonstrate how to visualize and analyze 3D vertex model simulations used in  
58 physics-based models. ParaView provides interactive visualization such that the user can view the 3D rendering  
59 from various angles, change color palettes, transparency, and rendering representation (e.g. wireframe, surface,  
60 volume) with a few mouse clicks. It contains filters that operate on the input data which can be manipulated, and  
61 then represented by plots, spreadsheets, or renderings. ParaView has an animation tool for time-lapse simulations  
62 to create movies or jump from a time step to another. Finally, it allows Python batch scripting without the need of  
63 using the pipeline.

64 ParaView handles its data structure using the Visualization Toolkit (VTK) [18], which may pose a steep learning  
65 curve for computational biologists, physicists, and engineers. To overcome such a hurdle, I briefly explain the VTK  
66 data structures necessary for a polyhedral mesh. I present a pseudocode to “convert” faces and vertices of  
67 polyhedral data into VTK data structures and output ParaView independent or a timeseries of files. I use the  
68 voro++ library [19] to create polyhedra by Voronoi tessellations. I modify voro++’s examples to create and output  
69 VTK data structures. All sample codes are available in [vis3Dvertex](#) along with a Singularity container image file  
70 (available on Github [release page](#)) that can be used to run the sample codes on a Linux machine with Singularity  
71 installed. In Section 4, I show how to visualize the output files in ParaView as well as how to manipulate the data  
72 using a few filters relevant for 3D vertex models. Although the focus of this work is on applications for biophysical  
73 models, this work is also relevant for any application that uses polyhedral unstructured meshes such as the  
74 materials science community who have used Voronoi-based models to understand material behavior under stress  
75 [20-23].

### 76 **3. Paraview and VTK framework: Creating 3D polyhedral unstructured grids**

#### 77 *3.1. VTK data structures and VTK polyhedral grids*

78 I will briefly give some examples of VTK data structures and refer the reader to the free-to-download VTK user’s  
79 guide, textbook, and Doxygen manuals for more details: <https://vtk.org/documentation/>. The primary data  
80 structure in VTK is a data object. Data objects can be abstract such as graphs and trees or well-defined such as  
81 structured or unstructured grids – the latter being the focus of this work. In structured data, for example  
82 rectilinear grids, we know the connection between nodes (i.e. topology) and, therefore, we do not need to  
83 explicitly define the coordinates of each point. Unstructured data, on the other hand, require topology and point  
84 coordinates to be defined. Consequently, unstructured data demands considerably more memory, and one should  
85 only use it when structured grids are not possible.

86 A VTK structured or unstructured grid is composed of “cell types.” VTK supports various cell type dimensionalities  
87 such as vertex in 0D, line in 1D, triangle, quadrilateral, polygon in 2D, and tetrahedron, hexahedron, polyhedron in  
88 3D (defined in the VTK source code `vtkCellType.h`). Cell types with a regular geometry, like tetrahedra (4 faces)  
89 and hexahedra (6 faces), use the vertices’ coordinates and a predefined ordering of the cell’s vertices to describe  
90 the cell topology. Thus, although we need to state the point coordinates, we do not need to explicitly define the  
91 topology of tetrahedral and hexahedral grids, saving some memory. In contrast, irregular polyhedral cells have a  
92 varying number of faces, and they need to have their topology explicitly defined along with their point  
93 coordinates. This work focuses on the polyhedral cells, represented by the VTK\_POLYHEDRON cell type, to allow  
94 the visualization and analysis of the most general 3D unstructured grid that is used in physics-based 3D vertex

95 models. Furthermore, the methodology presented here can be applied to experimental data whose vertex  
 96 positions and topology are defined. Note that the VTK\_POLYHEDRON only handles convex polyhedra; if concave  
 97 polyhedra exist, then the VTK\_POLYGON cell type can be used instead, such that a set of polygons would compose  
 98 a polyhedron.

99 The topology or connectivity in polyhedron cells is stored as stream of ordered faces in the following format:

```
[numberOfCellFaces, (numberOfPointsOfFace0, pointId0, pointId1, ... ),  

(numberOfPointsOfFace1, pointId0, pointId1, ...), ... ]
```

100 where numberOfCellFaces is the number of faces in the cell, numberOfPointsOfFace0 is the number of  
 101 points in the 0-th face, pointId0 is the vertex index of point 0, pointId1 is the vertex index of point 1 and so on.  
 102 Figure 1 shows one polyhedron and its face and vertex indexing lists from voro++'s modified example  
 103 cell\_statistics\_vtk.cc.  
 104 cell\_statistics\_vtk.cc.

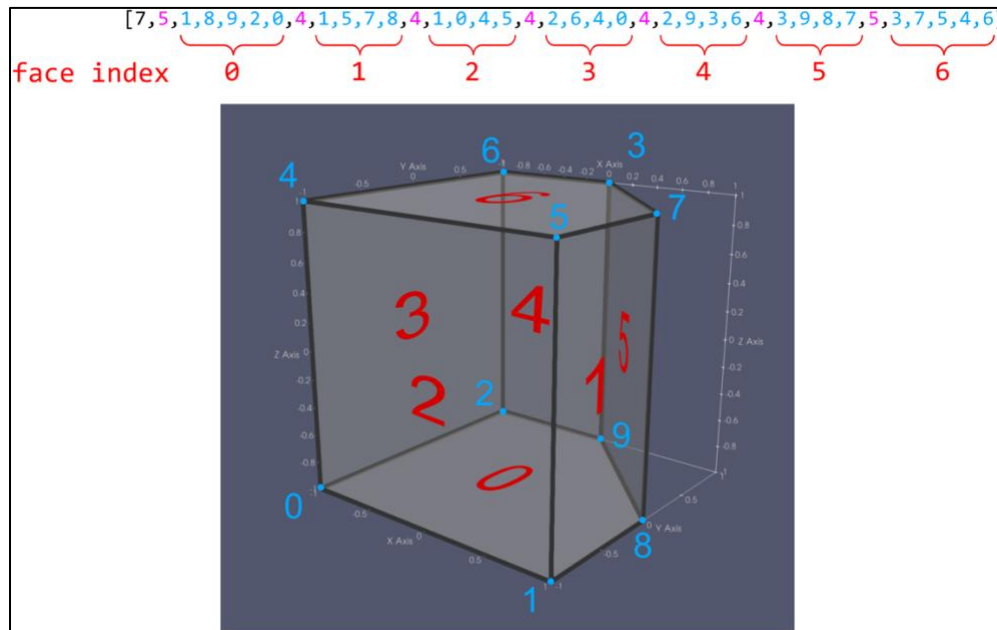

105  
 106 Figure 1: A polyhedron with labeled indices: vertex (blue) and face (red); and its VTK\_POLYHEDRON face stream (top) created  
 107 from voro++'s modified example cell\_statistics\_vtk.cc. The black number is the number of faces in the polyhedron,  
 108 pink numbers are vertices per face, blue numbers are vertex indices, and red numbers are face indices.

109 To add a cell into the unstructured grid vtkUnstructuredGrid, I use the method InsertNextCell:

```
110 vtkIdType InsertNextCell(int cellType, vtkIdList *faceStream)
```

111 where cellType is VTK\_POLYHEDRON and faceStream is shown in Figure 1.

112 The point coordinates are explicitly defined in the vtkPoints object and added to the vtkUnstructuredGrid  
 113 with the method InsertNextPoint:

```
114 vtkIdType InsertNextPoint(double xCoordinate, double yCoordinate, double zCoordinate)
```

115 With cells and vertices defined, the basic components of an unstructured grid, I can now define attributes for the  
 116 grid. Attributes can be variables used in the simulations such as time, pressure, velocity, force, surface area,  
 117 volume, etc. These attributes are stored as data arrays whose number of components is defined by the user (see  
 118 examples in Figure 2). Attributes can be point-, cell-, or field-based: PointData attributes are associated with the  
 119 points whereas CellData attributes are associated with each polyhedron and assumed constant over the entire  
 120 cell. FieldData gives a characteristic of the entire mesh – a common example is the time stamp.

### 121 3.2. Pseudocode

122 Figure 2 provides a pseudo code of the concepts of Section 3.1. The first three blocks create the VTK objects for the  
 123 unstructured grid and points objects. After these objects are created, three nested for-loops are necessary – cell,

124 face, and vertex – to populate the `vtkPoints` object and to create the ID list of the `VTK_POLYHEDRON` cell type.  
125 In the vertex loop, I insert the points coordinate into `vtkPoints` and add the vertex index into the `vtkIdList` of  
126 `VTK_POLYHEDRON` (Figure 1, blue numbers). In the face loop, the number of vertices per face (Figure 1, pink  
127 numbers) are inserted into the `vtkIdList` of `VTK_POLYHEDRON`. After the face loop, I insert each cell attribute to  
128 its corresponding object.

129 After the nested for-loops, cell attributes objects (e.g. `cellID`, `cellVolume`) and are inserted into the  
130 unstructured grid as a `CellData` attribute. The points and their `PointData` attributes, if any, are also inserted  
131 into the unstructured grid. Finally, I output the unstructured grid using a `vtkWriter` object.

```
// create unstructured grid and points (i.e. vertices)
create vtkUnstructuredGrid object
create vtkPoints object

// create field attributes (e.g. vtkTime)
create vtkAttribute object
set vtkAttribute number of components (scalar==1; vector==3)
set vtkAttribute number of tuples = 1
set vtkAttribute name

// create cell attributes (e.g. cellID, cellVolume, cellPosition)
create vtkAttribute object
set vtkAttribute number of components (scalar==1; vector==3)
set vtkAttribute number of tuples = number of cells
set vtkAttribute name

cellCounter = 0
loop through cells
    create vtkIdList object to represent cell

    // start creating the face stream as defined in Code XXX
    insert number of faces to vtkIdList
    loop through faces
        insert number of vertices to vtkIdList
        loop through vertices (using right-hand rule with inwards surface normal)
            insert vertex to vtkPoints
            insert vertexID to vtkIdList
        insert cell (i.e. vtkIdList) as a VTK_POLYHEDRON to vtkUnstructuredGrid

    // add attributes to cell
    insert cellCounter to cellID
    insert volume of cell to cellVolume
    insert (x,y,z) position of cell to cellPosition

    update cellCounter

// add cell data to unstructured grid
insert cellID to vtkUnstructuredGrid
insert cellVolume to vtkUnstructuredGrid
insert cellPosition to vtkUnstructuredGrid

// add point data to unstructured grid
insert vtkPoints to vtkUnstructuredGrid

// populate vtkTime and add field data to unstructured grid
insert simulation time to vtkTime
insert vtkTime to vtkUnstructuredGrid

// output unstructured grid
create vtkWriter object
set vtkWriter data to output (i.e. vtkUnstructuredGrid)
set vtkWriter file name
set vtkWriter file type (e.g. binary, ASCII)
update vtkWriter (i.e. outputs file)

// add unstructured grid filename to time series file
update time series file
```

132

133 Figure 2: Pseudocode to create a polyhedral vtkUnstructuredGrid with VTK\_POLYHEDRON cell type.

134 When the simulation iterates over time (or is minimized), one can write a ParaView timeseries file (.pvd) with the  
135 time stamp of each iteration and its corresponding “.vtu” unstructured grid file. For this iterative case, the  
136 pseudocode of Figure 2 would be contained within an iterative loop and each “.vtu” file needs the time stamp as a  
137 FieldData (second code block of Figure 2). Supplementary Figure S1 illustrates a timeseries for 5 iterations  
138 implemented in the voro++’s modified example random\_points\_vtk.cc.

139

### 140 3.3. Sample code using voro++

141 Figure 3 shows a snippet of `random_points_vtk.cc` with point coordinates insertion followed by the face loop  
142 where the `vtkFaces` object is populated for a single polyhedron. Note that in the `voro++` library, the container  
143 that holds the Voronoi cells does not have a global list of vertices. The vertices are, instead, listed per cell. When  
144 two cells share a face with  $N$  vertices, these  $N$  vertices are listed twice in the global list. Thus, in the example  
145 `random_points_vtk.cc`, the global list of vertices, `points`, has repeated point coordinates. Other codes,  
146 however, may have a unique list of global vertices in which case the variable `containerVertexStartIndex`  
147 would not be necessary.

```
// loop vertices and store their position
for( unsigned int i=0 ; i<v.size() ; i+=3 ) {
    points->InsertNextPoint(v[i], v[i+1], v[i+2]);
}

// loop over all faces of the Voronoi cell and populate vtkFaces with
// numberOfVerticesPerFace and their vertex indices
int j,k=0;
int numberOfVerticesPerFace;
while( (unsigned int)k<f_vert.size() ) {
    numberOfVerticesPerFace = f_vert[k++];
    vtkFaces->InsertNextId(numberOfVerticesPerFace); // number of vertices in 1 face

    j = k+numberOfVerticesPerFace;
    while( k<j ) {
        int containerIndex = f_vert[k++] + containerVertexStartIndex;
        vtkFaces->InsertNextId(containerIndex);
    } // end single face loop
} // end vertices loop
```

148  
149 Figure 3: Snippet of point coordinate insertion and VTK\_POLYHEDRON implemented in `random_points_vtk.cc`.

### 150 4. Implementation: ParaView basics

151 ParaView[15] works with visualization pipelines of sources, filters, and outputs. Figure 4 shows the main GUI  
152 components. In the “Pipeline Browser,” the user can view sources and filters along with their pipeline hierarchy  
153 indicated by the indentation. The user can select the “eye” on the left of the object to make it visible in the “3D  
154 View.” The “Properties” and “Information” panels are below the Pipeline Browser. These will display the properties  
155 and information of the pipeline selected object. The Properties panel also has the “Advanced Toggle” button  
156 which, if selected, displays additional properties about the object. Above the Pipeline Browser and 3D View, in the  
157 “Menu Bar,” the user can access most of ParaView’s features and “Toolbars,” which provides shortcuts to  
158 commonly used features. For an extended basic tutorial, refer to ParaView’s tutorial: The ParaView Tutorial  
159 version 5.4.1 [24], section – although an older version, the basics are mostly compatible with recent versions 5.9.X.

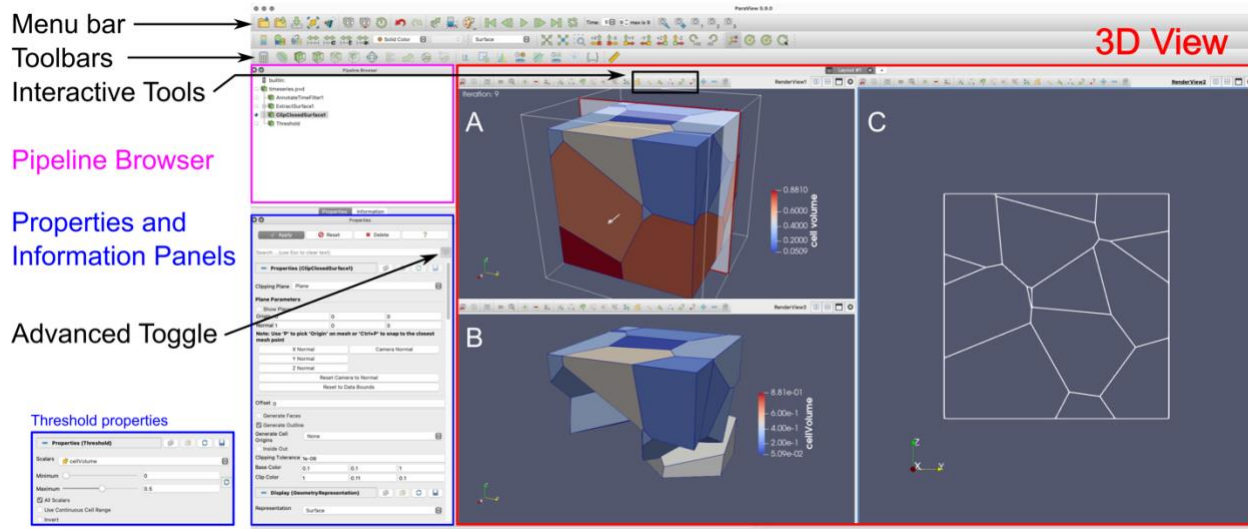

160

161 Figure 4: Paraview GUI. Figure adapted from Moreland [24] using voro++'s modified example random\_points\_vtk.cc. (A)  
 162 The entire sample colored by cell volume. (B) After "Threshold" filter is applied with the criterion  $0 \leq \text{cellVolume} \leq 0.5$  (blue  
 163 box). (C) A cross sectional plane at the plane indicated in panel A – for details, see SI Section 3.

### 164 5. Illustrative examples: relevant filters and tools for 3D vertex models

165 All filters in ParaView are accessible through the Menu Bar (Filters -> Alphabetical) or through shortcuts in the  
 166 Toolbar. The "Threshold" filter allows the user to define a scalar's minimum and maximum threshold values. The  
 167 cells within these limits will be displayed in the viewer. Figure 4 shows the entire Voronoi container before (panel  
 168 A) and after the Threshold filter is applied (panel B and blue box).

169 The "Glyph" filter is useful to visualize vectorial data that can be displayed as a line to represent orientation or as  
 170 an arrow that also includes the direction. In physics-based model, this representation is helpful to visualize velocity  
 171 fields and cell orientation (polarity). Sahu, Schwarz [25] used the glyph filter to visualize cell stratification in the  
 172 presence of heterotypic surface tension as shown in the blue-green-purple cells of Figure 5. The stratification  
 173 becomes more evident with the cell orientation illustrated by the line glyphs positioned at the cell center. For  
 174 more details on cell orientation, see Supplementary Information (SI) Section 2.

175 For simulations where cell velocity data is available, the filter "Stream Tracer" produces streamlines using a Runge-  
 176 Kutta integrator on the velocity data. Here, to illustrate a meaningful example of 3D streamlines, I use a simulation  
 177 from Sanematsu, Erdemci-Tandogan [26] to illustrate 3D streamlines around a spherical object as well the cells'  
 178 velocity field as arrow Glyphs.

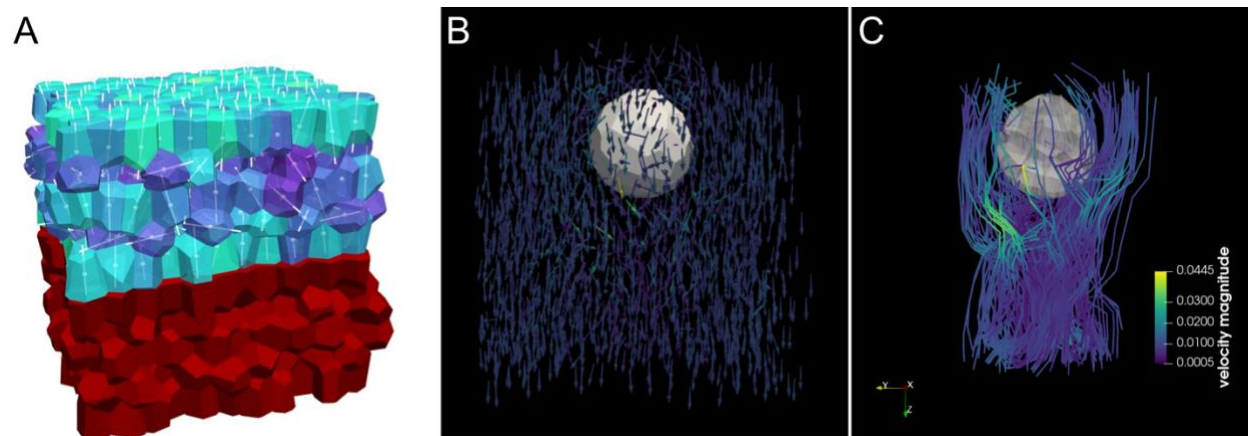

179

180 Figure 5: Glyph filter to show (A) cell orientation (reproduced from Sahu, Schwarz [25]; licensed under a Creative Commons  
 181 Attribution (CC BY) license); (B) velocity field; and (C) Streamlines generated by Stream Tracer filter.

182 The “Calculator” filter manipulates point or cell data by performing arithmetic operations. For cell-shape based  
183 models [10], Figure 6A shows how to calculate the cell shape parameter  $s = S/V^{2/3}$ , where  $S$  is the observed cell  
184 surface area and  $V$  is the cell observed volume. This example shows how a filter can be used to derive data and  
185 reduce storage space.

186 In addition to filters, “Interactive tools” are very useful during development and development (Figure 6B, C). They  
187 display cell or point data as the user hover the mouse over cells. For implementation details refer to SI Section 4.  
188 Another practical feature is the “File -> Save State”, which saves the pipeline workflow in a “.pvsm” file. This state  
189 file can be later loaded (File -> Load State) and the pipeline workflow is applied to the original data or another  
190 dataset (see SI Section 5).

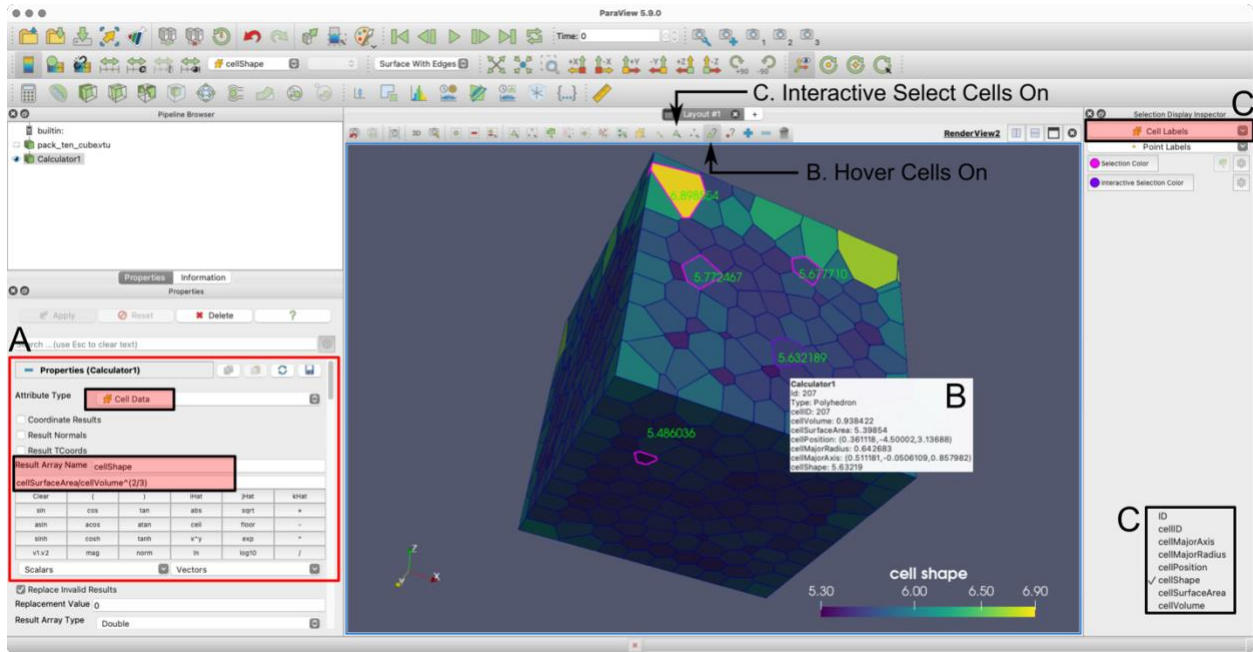

191  
192 Figure 6: voro++’s modified example `import_vtk.cc`. (A) Calculation of cell shape parameter ( $s = S/V^{2/3}$ ) using the  
193 “Calculator” filter (red rectangle) to manipulate CellData. (B) Display of “Hover Cells On” of the purple outlined cell. (C) Pink  
194 outlined cells selected using “Interactive Select Cells On”: green numbers are the cellShape value that were selected by clicking  
195 on “Cell Labels” on the top right-hand corner.

## 196 6. Conclusions

197 I present an efficient and powerful way to interactively visualize and analyze physics-based 3D vertex models using  
198 ParaView, an open-source software designed for scientific visualization of extremely large datasets. As ParaView  
199 uses the VTK library for its data structures, I first modify a very simple example from the voro++ library,  
200 `cell_statistics_vtk.cc`, to show how to “convert” a polyhedron’s vertices and faces into VTK data  
201 structures. I provide a general way to loop through a 3D-vertex model’s cells, faces, and points to create the VTK  
202 objects. I modify an example from the voro++ library, `random_points_vtk.cc`, to implement the pseudocode  
203 and create a timeseries file for time-evolving simulations. To visualize and analyze 3D vertex models, I present  
204 relevant ParaView filters for physics-based models by visualizing scalar and vectorial data. Other relevant tools that  
205 can be useful for debugging, such as the “Hover Cells On,” are also presented. To generate such examples, codes  
206 are available in [vis3Dvertex](https://vis3dvertex.com).

207 To start using ParaView can be a cumbersome task as the user has to become familiar with the pipeline workflow,  
208 VTK data structures, and polyhedral data structures. However, its existing capabilities of fast visualization,  
209 interactivity, and analysis are very useful to understand 3D vertex-models results in a timely manner. Here, I  
210 present examples to try to bridge the gap for biologists, biophysicists, engineers, and modelers so ParaView can be  
211 used to its potential. In addition, if it comes a day that 3D vertex models need CPU parallelization, ParaView is  
212 ready to be used.



## 213 **Acknowledgements**

214 This work is supported by NIH grants R01GM117598 and R01HD099031. Simulations were performed on Syracuse  
215 University HTC Campus Grid, which is supported by NSF award ACI-1341006. The author thanks Dr. Lisa Manning's  
216 mentorship and support for the realization of this manuscript, Dr. Larne Pekowski for patiently helping with  
217 Singularity and computing resources, and Dr. Preeti Sahu for providing valuable comments on this article.

## 218 **References**

- 219 1. Banavar, S.P., et al., *Mechanical control of tissue shape and morphogenetic flows during vertebrate body*  
220 *axis elongation*. Scientific Reports, 2021. **11**(1): p. 8591.
- 221 2. Kim, S., et al., *Embryonic tissues as active foams*. Nature Physics, 2021. **17**(7): p. 859-866.
- 222 3. Farhadifar, R., et al., *The Influence of Cell Mechanics, Cell-Cell Interactions, and Proliferation on Epithelial*  
223 *Packing*. Current Biology, 2007. **17**(24): p. 2095-2104.
- 224 4. Bi, D., et al., *Motility-driven glass and jamming transitions in biological tissues*. Phys Rev X, 2016. **6**(2).
- 225 5. Fletcher, Alexander G., et al., *Vertex Models of Epithelial Morphogenesis*. Biophysical Journal, 2014.  
226 **106**(11): p. 2291-2304.
- 227 6. Park, J.-A., et al., *Unjamming and cell shape in the asthmatic airway epithelium*. Nature Materials, 2015.  
228 **14**(10): p. 1040-1048.
- 229 7. Okuda, S. and K. Fujimoto, *A Mechanical Instability in Planar Epithelial Monolayers Leads to Cell Extrusion*.  
230 Biophys J, 2020. **118**(10): p. 2549-2560.
- 231 8. Krajnc, M., et al., *Fluidization of epithelial sheets by active cell rearrangements*. Phys Rev E, 2018. **98**(2-1):  
232 p. 022409.
- 233 9. Honda, H., M. Tanemura, and T. Nagai, *A three-dimensional vertex dynamics cell model of space-filling*  
234 *polyhedra simulating cell behavior in a cell aggregate*. J Theor Biol, 2004. **226**(4): p. 439-53.
- 235 10. Merkel, M. and M.L. Manning, *A geometrically controlled rigidity transition in a model for confluent 3D*  
236 *tissues*. New Journal of Physics, 2018. **20**(2): p. 022002.
- 237 11. Okuda, S., et al., *Modeling cell proliferation for simulating three-dimensional tissue morphogenesis based*  
238 *on a reversible network reconnection framework*. Biomechanics and Modeling in Mechanobiology, 2013.  
239 **12**(5): p. 987-996.
- 240 12. Persistence of Vision Pty. Ltd., *Persistence of Vision Raytracer*. 2004.
- 241 13. MATLAB, *version 9.4.0.813654 (R2018a)*. 2018, Natick, Massachusetts: The Mathworks Inc.
- 242 14. Childs, H., et al., *VisIt: An end-user tool for visualizing and analyzing very large data*. 2012.
- 243 15. Ahrens, J., B. Geveci, and C. Law, *Paraview: An end-user tool for large data visualization*. The visualization  
244 handbook, 2005. **717**.
- 245 16. Caswell, T.A., et al., *matplotlib/matplotlib: REL: v3.3.2*. 2020, Zenodo.
- 246 17. Woodring, J., et al., *Analyzing and visualizing cosmological simulations with ParaView*. The Astrophysical  
247 Journal Supplement Series, 2011. **195**(1).
- 248 18. Schroeder, W., et al., *The Visualization Toolkit: An Object-oriented Approach to 3D Graphics*. 2006:  
249 Kitware.
- 250 19. Rycroft, C., *Voro++: A three-dimensional Voronoi cell library in C++*. 2009, Lawrence Berkeley National  
251 Lab.(LBNL), Berkeley, CA (United States).
- 252 20. Zhu, D.-F., et al., *A 3D Voronoi and subdivision model for calibration of rock properties*. Modelling and  
253 Simulation in Materials Science and Engineering, 2017. **25**(8): p. 085005.
- 254 21. Song, Y., et al., *Dynamic crushing behavior of 3D closed-cell foams based on Voronoi random model*.  
255 Materials & Design, 2010. **31**(9): p. 4281-4289.
- 256 22. Ghazvinian, E., M.S. Diederichs, and R. Quey, *3D random Voronoi grain-based models for simulation of*  
257 *brittle rock damage and fabric-guided micro-fracturing*. Journal of Rock Mechanics and Geotechnical  
258 Engineering, 2014. **6**(6): p. 506-521.
- 259 23. Chen, J., et al., *On the crushing response of the functionally graded metallic foams based on 3D Voronoi*  
260 *model*. Thin-Walled Structures, 2020. **157**: p. 107085.
- 261 24. Moreland, K., *The ParaView Tutorial*. n.d. p. 151.
- 262 25. Sahu, P., J. Schwarz, and M.L. Manning, *Geometric signatures of tissue surface tension in a three-*  
263 *dimensional model of confluent tissue*. New Journal of Physics, 2021.

264 26. Sanematsu, P.C., et al., *3D viscoelastic drag forces contribute to cell shape changes during organogenesis*  
265 *in the zebrafish embryo*. Cells & Development, 2021: p. 203718.

266

267 **B- Required Metadata**

268

269 *Table 1 – Code metadata*

| Nr | Code metadata description                                       |                                                                                                                                                                                                                                                                                                                |
|----|-----------------------------------------------------------------|----------------------------------------------------------------------------------------------------------------------------------------------------------------------------------------------------------------------------------------------------------------------------------------------------------------|
| C1 | Current Code version                                            | <i>V1.0.0</i>                                                                                                                                                                                                                                                                                                  |
| C2 | Permanent link to code / repository used of this code version   | <a href="https://github.com/pcsanematsu/vis3Dvertex">https://github.com/pcsanematsu/vis3Dvertex</a>                                                                                                                                                                                                            |
| C3 | Legal Code License                                              | <i>GNU General Public License v2.0</i>                                                                                                                                                                                                                                                                         |
| C4 | Code Versioning system used                                     | <i>git</i>                                                                                                                                                                                                                                                                                                     |
| C5 | Software Code Language used                                     | <i>c++</i>                                                                                                                                                                                                                                                                                                     |
| C6 | Compilation requirements, Operating environments & dependencies | <i>Required libraries: voro++, Eigen3, VTK; examples were tested on a Linux machine with the Singularity container image available on the release v1.0.0:</i><br><a href="https://github.com/pcsanematsu/vis3Dvertex/releases/tag/v1.0.0">https://github.com/pcsanematsu/vis3Dvertex/releases/tag/v1.0.0</a> . |
| C7 | If available Link to developer documentation / manual           | <a href="https://github.com/pcsanematsu/vis3Dvertex#readme">https://github.com/pcsanematsu/vis3Dvertex#readme</a>                                                                                                                                                                                              |
| C8 | Support email for questions                                     | <i>pcsanema@syr.edu</i>                                                                                                                                                                                                                                                                                        |

270
